# Supplementary material for: Impact of an in-consult patient decision aid on treatment choices and outcomes of management for patients with an endoscopically resected malignant colorectal polyp: a study protocol for a non-randomised clinical phase II study
Source: HighWire-hosted journal article supplement (doi:10.1136/bmjopen-2023-073900), 2023-11-01

Patient Decision Aid for **Management of endoscopically resected malignant colorectal polyps.**

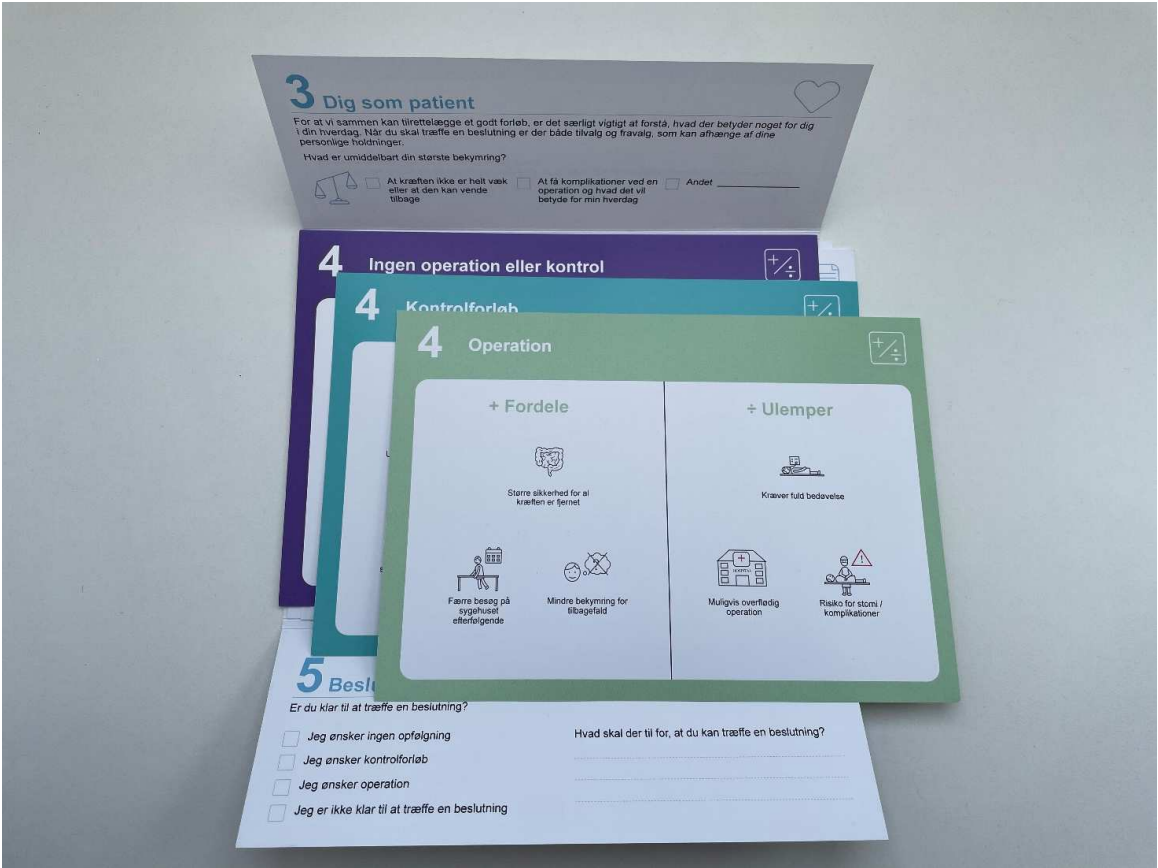

Supplement: bmjopen-2023-073900supp004_data_supplement.pdf [file bmjopen-2023-073900supp004_data_supplement.pdf]
